# Supplementary material for: Effects of Two Different Methods of Teeth Grinding on Dental Injuries, Skin Lesions, Growth and Behaviour of Suckling Piglets Compared to a Non-Treated Control Group
Source: MDPI journal article supplement (doi:10.3390/ani14091318), 2024-04-28
Supplement: s1 [file s1]

**Table S1.** Structured table for the mixed logistic regression model, including the table of coefficients as well as the results of the F-test for the behaviour “suckling” vs. “lying”.

|                               | Estimate | Odds Ratio | Std. Error | df1 | df2 | f-Value | p-Value |
|-------------------------------|----------|------------|------------|-----|-----|---------|---------|
| intercept                     | 0.121    |            | 0.112      |     |     |         |         |
| method = TCG                  | 0.024    | 1.024      | 0.140      |     |     |         |         |
| method = RG                   | 0.045    | 1.046      | 0.140      |     |     |         |         |
| time = 1. week                | -0.701   | 0.496      | 0.103      |     |     |         |         |
| time = 2. week                | -1.003   | 0.367      | 0.112      |     |     |         |         |
| time = 3. week                | -0.840   | 0.432      | 0.113      |     |     |         |         |
| time = 4. week                | -1.205   | 0.300      | 0.115      |     |     |         |         |
| morning/afternoon = afternoon | -0.067   | 0.935      | 0.024      |     |     |         |         |
| sex = male                    | 0.024    | 1.024      | 0.024      |     |     |         |         |
| method = TCG; time = 1. Week  | -0.012   | 0.988      | 0.145      |     |     |         |         |
| method = RG; time = 1. week   | -0.057   | 0.945      | 0.146      |     |     |         |         |
| method = TCG; time = 2. Week  | -0.005   | 0.995      | 0.158      |     |     |         |         |
| method = RG; time = 2. Week   | 0.085    | 1.089      | 0.159      |     |     |         |         |
| method = TCG; time = 3. Week  | -0.034   | 0.967      | 0.159      |     |     |         |         |
| method = RG; time = 3. Week   | -0.102   | 0.903      | 0.160      |     |     |         |         |
| method = TCG; time = 4. Week  | 0.019    | 1.020      | 0.162      |     |     |         |         |
| method = RG; time = 4. week   | 0.110    | 1.117      | 0.163      |     |     |         |         |
| model term                    |          |            |            |     |     |         |         |
| method                        |          |            |            | 2   | ∞   | 0.886   | 0.412   |
| time                          |          |            |            | 4   | ∞   | 91.230  | <0.0001 |
| morning/afternoon             |          |            |            | 1   | ∞   | 7.660   | 0.006   |
| sex                           |          |            |            | 1   | ∞   | 0.948   | 0.330   |
| method × time                 |          |            |            | 8   | ∞   | 0.945   | 0.477   |

**Table S2.** Structured table for the mixed logistic regression model including the table of coefficients as well as the results of the F-test for the behaviour “eating/drinking” vs. “lying”.

|                | Estimate | Odds Ratio | Std. Error | df1 | df2 | f-Value | p-Value |
|----------------|----------|------------|------------|-----|-----|---------|---------|
| intercept      | -5.833   |            | 0.931      |     |     |         |         |
| method = TCG   | 0.629    | 1.876      | 1.131      |     |     |         |         |
| method = RG    | 0.866    | 2.378      | 1.123      |     |     |         |         |
| time = 1. week | 0.905    | 2.473      | 0.928      |     |     |         |         |
| time = 2. week | 0.498    | 1.645      | 0.980      |     |     |         |         |
| time = 3. week | 1.324    | 3.759      | 0.947      |     |     |         |         |
| time = 4. week | 1.988    | 7.299      | 0.930      |     |     |         |         |

|                               |        |       |       |   |          |        |         |
|-------------------------------|--------|-------|-------|---|----------|--------|---------|
| morning/afternoon = afternoon | -0.737 | 0.478 | 0.123 |   |          |        |         |
| sex = male                    | 0.073  | 1.076 | 0.131 |   |          |        |         |
| method = TCG; time = 1. Week  | -0.817 | 0.442 | 1.154 |   |          |        |         |
| method = RG; time = 1. week   | -1.161 | 0.313 | 1.148 |   |          |        |         |
| method = TCG; time = 2. Week  | -0.572 | 0.564 | 1.230 |   |          |        |         |
| method = RG; time = 2. Week   | -0.326 | 0.722 | 1.210 |   |          |        |         |
| method = TCG; time = 3. Week  | -0.416 | 0.660 | 1.181 |   |          |        |         |
| method = RG; time = 3. Week   | -0.503 | 0.605 | 1.170 |   |          |        |         |
| method = TCG; time = 4. Week  | -0.369 | 0.692 | 1.153 |   |          |        |         |
| method = RG; time = 4. week   | -0.567 | 0.567 | 1.146 |   |          |        |         |
| model term                    |        |       |       |   |          |        |         |
| method                        |        |       |       | 2 | $\infty$ | 0.869  | 0.419   |
| time                          |        |       |       | 4 | $\infty$ | 30.421 | <0.0001 |
| morning/afternoon             |        |       |       | 1 | $\infty$ | 35.911 | <0.0001 |
| sex                           |        |       |       | 1 | $\infty$ | 0.314  | 0.575   |
| method $\times$ time          |        |       |       | 8 | $\infty$ | 0.725  | 0.669   |

**Table S3.** Structured table for the mixed logistic regression model, including the table of coefficients as well as the results of the F-test for the “active behaviour” vs. “lying”.

|                               | Estimate | Odds Ratio | Std.<br>Error | df1 | df2      | f-Value | p-Value |
|-------------------------------|----------|------------|---------------|-----|----------|---------|---------|
| intercept                     | -3.327   |            | 0.931         |     |          |         |         |
| method = TCG                  | 0.705    | 2.024      | 0.451         |     |          |         |         |
| method = RG                   | 0.962    | 2.618      | 0.437         |     |          |         |         |
| time = 1. week                | 1.060    | 2.885      | 0.370         |     |          |         |         |
| time = 2. week                | 1.492    | 4.448      | 0.374         |     |          |         |         |
| time = 3. week                | 1.745    | 5.727      | 0.373         |     |          |         |         |
| time = 4. week                | 1.563    | 4.773      | 0.374         |     |          |         |         |
| morning/afternoon = afternoon | -0.207   | 0.813      | 0.041         |     |          |         |         |
| sex = male                    | -0.084   | 0.919      | 0.042         |     |          |         |         |
| method = TCG; time = 1. Week  | -0.681   | 0.506      | 0.458         |     |          |         |         |
| method = RG; time = 1. week   | -1.052   | 0.349      | 0.445         |     |          |         |         |
| method = TCG; time = 2. Week  | -0.793   | 0.452      | 0.465         |     |          |         |         |
| method = RG; time = 2. Week   | -0.916   | 0.400      | 0.452         |     |          |         |         |
| method = TCG; time = 3. Week  | -0.703   | 0.495      | 0.463         |     |          |         |         |
| method = RG; time = 3. Week   | -1.056   | 0.348      | 0.451         |     |          |         |         |
| method = TCG; time = 4. Week  | -0.725   | 0.484      | 0.465         |     |          |         |         |
| method = RG; time = 4. week   | -0.902   | 0.406      | 0.452         |     |          |         |         |
| model term                    |          |            |               |     |          |         |         |
| method                        |          |            |               | 2   | $\infty$ | 1.666   | 0.189   |
| time                          |          |            |               | 4   | $\infty$ | 52.300  | <0.0001 |
| morning/afternoon             |          |            |               | 1   | $\infty$ | 25.265  | <0.0001 |
| sex                           |          |            |               | 1   | $\infty$ | 4.048   | 0.044   |
| method $\times$ time          |          |            |               | 8   | $\infty$ | 1.219   | 0.283   |

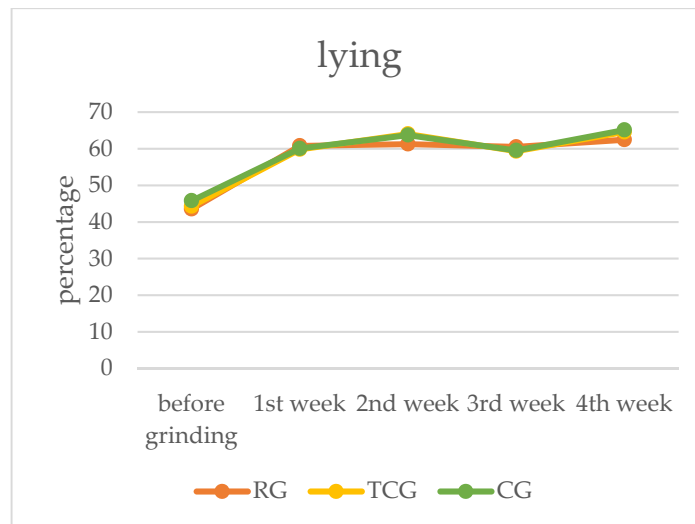

(a)

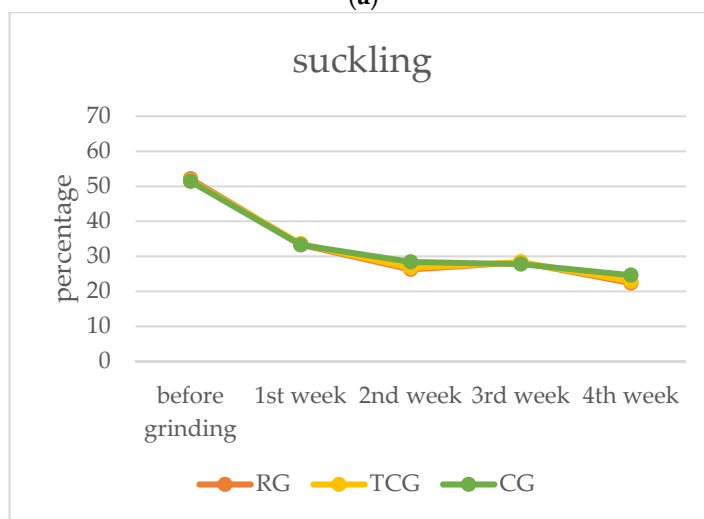

(b)

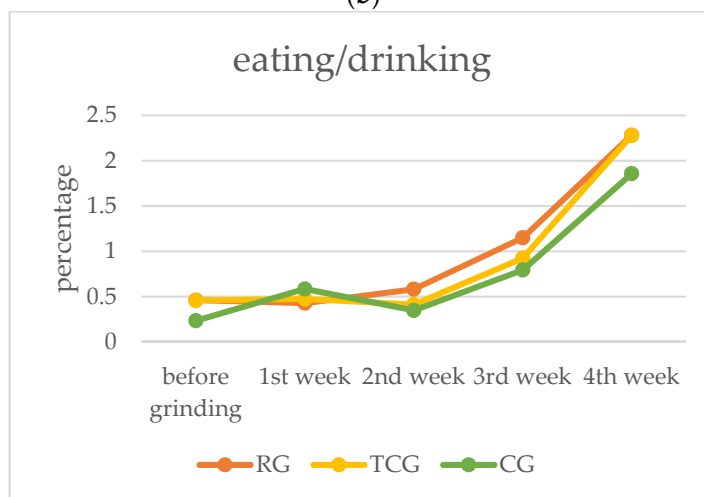

(c)

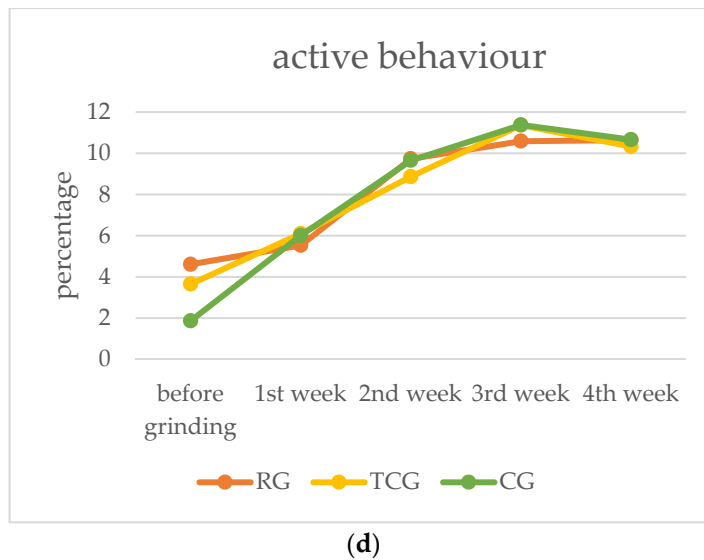

**Figure S1.** Mean percentage for different behaviours ((a) lying, (b) suckling, (c) eating/drinking, (d) active behaviour) related to all observations per piglet in the different treatment groups (RG = roller-grinding, TCG = teacup-grinding, CG = control group without teeth grinding) and in different weeks of the study (before grinding until the fourth week after grinding).
